# Supplementary material for: Dietary flavonoid intake and the risk of stroke: a dose-response meta-analysis of prospective cohort studies
Source: PubMed Central journal article supplement — BMJ Open. 2016 Jun 8;6(6):e008680. doi: 10.1136/bmjopen-2015-008680 (PMC4908865; doi:10.1136/bmjopen-2015-008680), 2016-06-08
Supplement: bmjopen-2015-008680supp_tables.pdf [file bmjopen-2015-008680supp_tables.pdf]

**Supplemental table 1.** Confounding factors and methods for adjustment

| Reference                                | Adjusted covariates                                                                                                                                                                           | Total stroke                     | Nonfatal stroke | Fatal Stroke     | Ischemic Stroke  | Hemorrhagic stroke |
|------------------------------------------|-----------------------------------------------------------------------------------------------------------------------------------------------------------------------------------------------|----------------------------------|-----------------|------------------|------------------|--------------------|
| Hirvonen et al. <sup>8</sup> 2000        | Age, BMI, SBP, DBP, height, cholesterol, diabetes, history CHD, smoking, alcohol, supplementation group and education.                                                                        | equal to ischemic stroke results |                 |                  | 0.98 (0.80-1.21) |                    |
| Arts et al. <sup>9</sup> 2001            | Age, BMI, smoking, alcohol, physical activity, coffee, diet, energy, FA, prescribed diet, intakes of fish, coffee, cholesterol, fiber, fish, vit C, vit E and $\beta$ -carotene               | 0.92 (0.51-1.68)                 |                 |                  |                  |                    |
| Knekt et al. <sup>10</sup> 2002          | Age, sex, geographic area, occupation, BMI, BP, cholesterol, diabetes, region, SE and smoking                                                                                                 | 0.79 (0.64-0.98)                 |                 |                  |                  |                    |
| Sesso et al. <sup>11</sup> 2003          | Age, exercise, aspirin, BMI, BP, postmenopausal hormone use, cholesterol, diabetes, history of CHD, smoking, alcohol, F & V, fiber, folate and vit E.                                         | 0.70 (0.46-1.07)                 |                 |                  |                  |                    |
| Marniemi et al. <sup>12</sup> 2005       | Age, sex, smoking, functional capacity and weight adjusted energy intake.                                                                                                                     | 0.65 (0.34-1.23)                 |                 |                  |                  |                    |
| van der Schouw et al. <sup>13</sup> 2005 | Age, BMI, cholesterol, physical activity, diabetes, hypertension, hypercholesterolemia, HRT, OC, MS, smoking, alcohol, energy, F & A, fiber, protein, fruit, vegetable and menopausal status. | 1.05 (0.64-1.70)                 |                 |                  |                  |                    |
| Mink et al. <sup>14</sup> 2007           | Age, BMI, BP, diabetes, HRT, MS, education, smoking, activity, estrogen use, WHR and energy                                                                                                   | equal to fatal stroke results    |                 | 0.94 (0.69-1.29) |                  |                    |
| Mursu et al. <sup>15</sup> 2008          | Age, examination years, BMI, SBP, HM, cholesterol, TAG, maximal oxygen uptake, smoking, history of CVD, diabetes, alcohol, energy-adjusted intake of folate and vit E.                        | equal to ischemic stroke results |                 |                  | 0.71 (0.37-1.37) |                    |
| Cassidy et al. <sup>16</sup> 2012        | Age, physical activity, smoking, HRT, BMI, aspirin use,                                                                                                                                       | equal to                         |                 |                  | 0.90 (0.73-1.11) |                    |

|                                      |                                                                                                                                                                               |                               |                  |
|--------------------------------------|-------------------------------------------------------------------------------------------------------------------------------------------------------------------------------|-------------------------------|------------------|
|                                      | diabetes, hypercholesterolemia, history of CHD, alcohol, menopausal status, energy, use of multivitamins and history of hypertension                                          | ischemic stroke results       |                  |
| McCullough et al. <sup>17</sup> 2012 | Age, smoking, beer and liquor intake, history of hypertension, history of cholesterol, family history of MI, BMI, physical activity, energy intake, aspirin use, HRT, and sex | equal to fatal stroke results | 0.83 (0.66-1.04) |
| Talaei et al. <sup>18</sup> 2014     | Age, sex, dialect, year of interview, educational level, BMI, physical activity, smoking duration, alcohol, diabetes, hypertension, CHD, stroke, energy and fiber             | equal to fatal stroke results | 0.97 (0.81-1.16) |

---

Abbreviations: BMI, body mass index; CVD, cardiovascular disease; CHD, coronary heart disease; BP, blood pressure; SBP: systolic blood pressures; DBP: diastolic blood pressures; vit C: vitamin C; vit E: vitamin E; FA: fatty acids; F & V: fruit and vegetable intake; MS: menopausal status; HRT: hormonal replacement therapy; OC: oral contraceptives; WHR: waist-to-hip ratio; HM: hypertension medication; MI: myocardial infarction.

**Supplemental table 2.** Flavonoid subclasses and compounds for each study.

| Reference                                  | Flavonoid subclasses                                                                                                                                                                                                                                                                             |
|--------------------------------------------|--------------------------------------------------------------------------------------------------------------------------------------------------------------------------------------------------------------------------------------------------------------------------------------------------|
| Hirvonen et al. <sup>8</sup> 2000          | Quercetin, kaempferol, myricetin, luteolin, and apigenin..                                                                                                                                                                                                                                       |
| Arts et al. <sup>9</sup> 2001              | Quercetin, kaempferol, myricetin, luteolin, and apigenin..                                                                                                                                                                                                                                       |
| Knekt et al. <sup>10</sup> 2002            | 4 flavonols (kaempferol, quercetin, myricetin, and isorhamnetin), 2 flavones (apigenin and luteolin), and 3 flavanones (hesperetin, naringenin, and eriodictyol).                                                                                                                                |
| Sesso et al. <sup>11</sup> 2003            | Quercetin, kaempferol, myricetin, luteolin, and apigenin..                                                                                                                                                                                                                                       |
| Marniemi et al. <sup>12</sup> 2005         | Quercetin, kaempferol, myricetin, luteolin, and apigenin..                                                                                                                                                                                                                                       |
| van der Schouw et al. <sup>13</sup> 2005   | Daidzein, Genistein, Formononetin, Biochanin A.                                                                                                                                                                                                                                                  |
| Mink et al. <sup>14</sup> 2007             | 4 flavonols (kaempferol, quercetin, myricetin, and isorhamnetin), 2 flavones (apigenin and luteolin), 3 flavanones (hesperetin, naringenin, and eriodictyol), <b>flavan-3-ols, anthocyanidins, isoflavones, proanthocyanidins.</b>                                                               |
| Mursu et al. <sup>15</sup> 2008            | Flavonols, flavones, flavanones, flavan-3-ols and anthocyanidins.                                                                                                                                                                                                                                |
| Cassidy et al. <sup>16</sup> 2012          | 4 flavonols (kaempferol, quercetin, myricetin, and isorhamnetin), 2 flavones (apigenin and luteolin), 6 anthocyanins (cyaniding, delphinindin, malvidin, pelargonidin, petunidin, peonidin), flavan-3-ols (catechins, epicatechins), and 3 flavanones (hesperetin, naringenin, and eriodictyol). |
| <b>McCullough et al.<sup>17</sup> 2012</b> | <b>Anthocyanidins, flavan-3-ols, flavanones, flavones, flavonols, proanthocyanidins, isoflavones.</b>                                                                                                                                                                                            |
| Talaei et al. <sup>18</sup> 2014           | Genistein, daidzein, and glycitein.                                                                                                                                                                                                                                                              |
