# Supplementary figures and images for: Dietary flavonoid intake and the risk of stroke: a dose-response meta-analysis of prospective cohort studies
Source: PubMed Central journal article supplement — BMJ Open. 2016 Jun 8;6(6):e008680. doi: 10.1136/bmjopen-2015-008680 (PMC4908865; doi:10.1136/bmjopen-2015-008680), 2016-06-08

**Supplemental figure 1. Egger funnel plot for detection of publication bias for stroke risk. (DOC)**

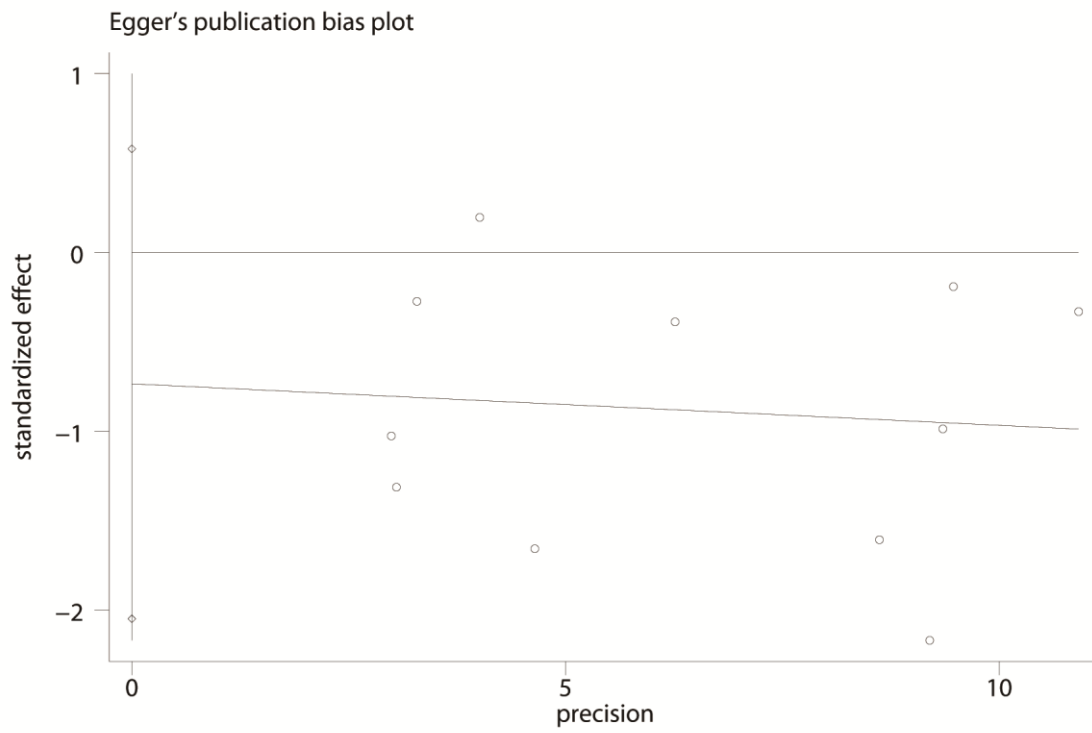

Supplement: bmjopen-2015-008680supp_figure.pdf [file bmjopen-2015-008680supp_figure.pdf]
